# Supplementary material for: De novo design of stereochemically-bent sixteen-residue β-hairpin as a hydrolase mimic
Source: Royal Society of Chemistry journal article supplement (doi:10.1039/c5ra19015k), 2015-01-01
Supplement: c5ra19015k1.pdf [file c5ra19015k1.pdf]

## Electronic Supporting Information (ESI)

# *De Novo* design of stereochemically-bent sixteen-residue $\beta$ -hairpin as a hydrolase mimic

Bhupesh Goyal\*<sup>1</sup>, Kirti Patel, Kinshuk Raj Srivastava and Susheel Durani

Department of Chemistry, Indian Institute of Technology Bombay,  
Mumbai–400076, India

\*Corresponding author

E-mail address: [bhupesh@iitbombay.org](mailto:bhupesh@iitbombay.org)

<sup>1</sup>**Present Address**

Department of Chemistry, School of Basic and Applied Sciences, Sri Guru Granth Sahib  
World University, Fatehgarh Sahib–140406, Punjab, India.

### Supporting Information captions

**Fig. S1:** Mass spectra of sixteen-residue peptide variants.

**Fig. S2:**  $^1\text{H-NMR}$  spectra of peptide variants recorded in 90%  $\text{H}_2\text{O}/10\%$   $\text{D}_2\text{O}$  at 298 K on a 700 MHz spectrometer.

**Fig. S3:** CD spectrum of peptide variants in water at 298 K in 20–100  $\mu\text{M}$  concentration range. Y-axis represents the mean residue molar ellipticity and X-axis represents wavelength in nm.

**Fig. S4:** Quenching of tryptophan fluorescence of peptide variants (15  $\mu\text{M}$ ) in sodium phosphate buffer (pH 7.0, 20 mM) at 298 K on progressive titration with increasing pNPP concentration (0–300  $\mu\text{M}$ ) (**left panel**), and plot of relative fluorescence intensity as a function of pNPP concentration (0–300  $\mu\text{M}$ ) (**right panel**).

**Fig. S5:** UV monitored rate of hydrolysis of pNPA with peptide variants in sodium phosphate buffer (pH 7.0, 20 mM) at 298 K on progressive titration with increasing pNPA concentration (0–75  $\mu\text{M}$ ) in the form of Michaelis–Menten plot (**left panel**) and Lineweaver–Burk plot (**right panel**).

Elemental Composition Report

Single Mass Analysis

Tolerance = 10.0 PPM / DBE: min = -1.5, max = 50.0

Isotope cluster parameters: Separation = 1.0 Abundance = 1.0%

Monoisotopic Mass, Odd and Even Electron Ions

.1196 formula(e) evaluated with 1 results within limits (all results (up to 1000) for each mass)

Micromass : Q-ToF micro (YA-105)

Department Of Chemistry I.I.T.(B)

C87H122N22O26

SD-BG-16MER-SEQ1 27 (0.505) AM (Cen,4, 80.00, Ar,5700.0,556.28,0.76); Sm (Mn, 2x4.00); Sb (5,40.00 ); Cm (1:31)

Ionisation Mode

TOF MS ES+

4.22e3

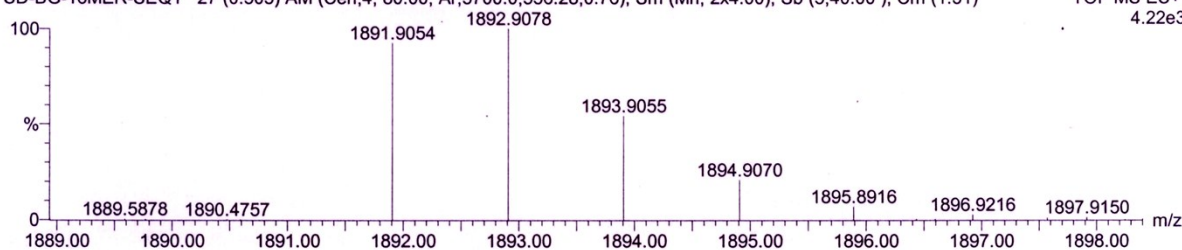

Minimum: -1.5  
Maximum: 200.0 10.0 50.0

| Mass      | Calc. Mass | mDa | PPM | DBE  | Score | Formula          |
|-----------|------------|-----|-----|------|-------|------------------|
| 1891.9054 | 1891.8979  | 7.5 | 4.0 | 37.5 | 1     | C87 H123 N22 O26 |

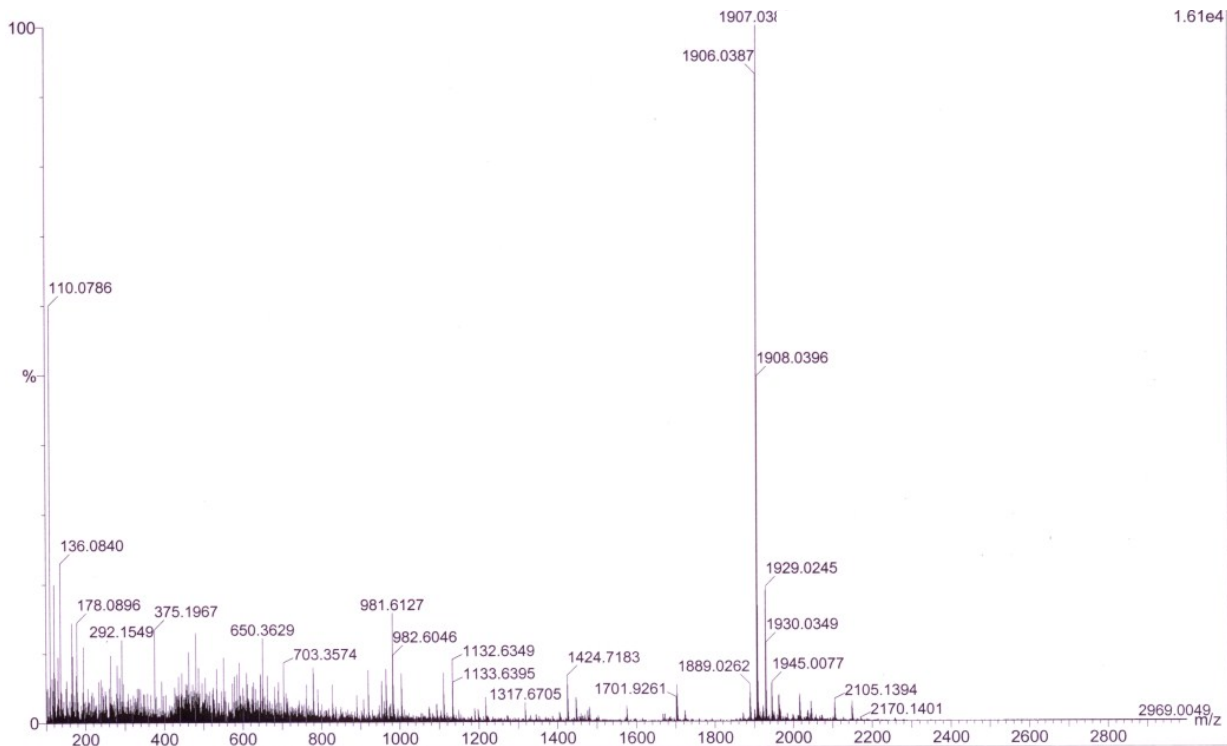

## Elemental Composition Report

Page 1

## Single Mass Analysis

Tolerance = 10.0 PPM / DBE: min = -1.5, max = 50.0

Isotope cluster parameters: Separation = 1.0 Abundance = 1.0%

## Monoisotopic Mass, Odd and Even Electron Ions

1098 formula(e) evaluated with 1 results within limits (all results (up to 1000) for each mass)

Micromass : Q-ToF micro (YA-105)

Department Of Chemistry I.I.T.(B)

C84H117N21O25

SD-BG-16MER-SEQ3 2 (0.037) AM (Med,4, Ar,5700.0,556.28,0.76); Sm (Mn, 2x4.00); Cm (1:40)

Ionisation Mode  
TOF MS ES+  
5.00e3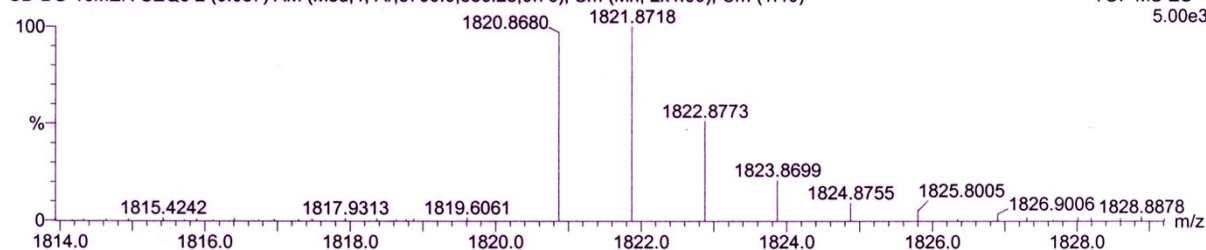

Minimum: -1.5  
Maximum: 200.0 10.0 50.0

| Mass      | Calc. Mass | mDa | PPM | DBE  | Score | Formula          |
|-----------|------------|-----|-----|------|-------|------------------|
| 1820.8680 | 1820.8608  | 7.3 | 4.0 | 36.5 | 1     | C84 H118 N21 O25 |

## Elemental Composition Report

Page 1

## Single Mass Analysis

Tolerance = 10.0 PPM / DBE: min = -1.5, max = 50.0

Isotope cluster parameters: Separation = 1.0 Abundance = 1.0%

## Monoisotopic Mass, Odd and Even Electron Ions

1196 formula(e) evaluated with 1 results within limits (all results (up to 1000) for each mass)

Micromass : Q-ToF micro (YA-105)

Department Of Chemistry I.I.T.(B)

C87H122N22O26

SD-BG-16MER-SEQ4 31 (0.575) AM (Med,4, Ar,5700.0,556.28,0.76); Sm (Mn, 2x4.00); Sm (Md, 4.00); Cm (1:31)

Ionisation Mode  
TOF MS ES+  
3.05e3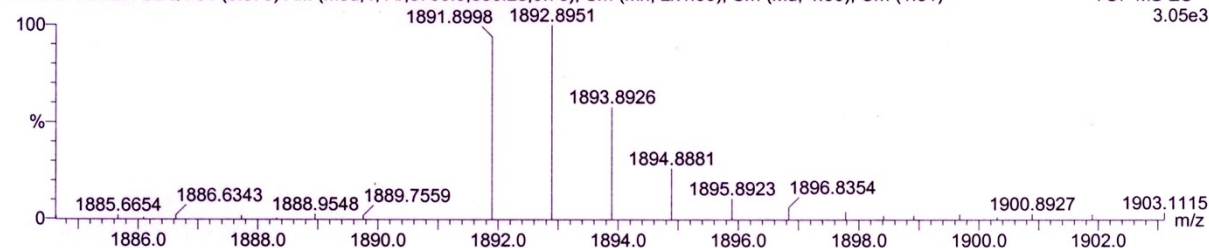

Minimum: -1.5  
Maximum: 200.0 10.0 50.0

| Mass      | Calc. Mass | mDa | PPM | DBE  | Score | Formula          |
|-----------|------------|-----|-----|------|-------|------------------|
| 1891.8998 | 1891.8979  | 1.9 | 1.0 | 37.5 | 1     | C87 H123 N22 O26 |

## Elemental Composition Report

## Single Mass Analysis

Tolerance = 10.0 PPM / DBE: min = -1.5, max = 50.0

Isotope cluster parameters: Separation = 1.0 Abundance = 1.0%

Monoisotopic Mass, Odd and Even Electron Ions

1298 formula(e) evaluated with 1 results within limits (all results (up to 1000) for each mass)

Micromass : Q-ToF micro (YA-105)

Department Of Chemistry I.I.T.(B)

C86H121N23O27

SD-BG-16MER-SEQ5 26 (0.487) AM (Top,4, Ar,5700.0,556.28,0.76); Sb (5,40.00 ); Cm (1:32)

Ionisation Mode  
TOF MS ES+  
1.90e3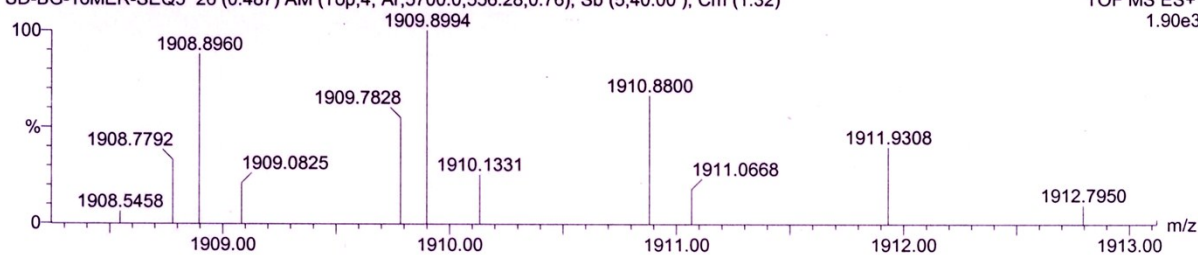

Minimum:

Maximum: 200.0 10.0 -1.5 50.0

| Mass      | Calc. Mass | mDa | PPM | DBE  | Score | Formula          |
|-----------|------------|-----|-----|------|-------|------------------|
| 1908.8960 | 1908.8881  | 7.9 | 4.2 | 37.5 | 1     | C86 H122 N23 O27 |

Fig. S1: Mass spectra of sixteen-residue peptide variants.

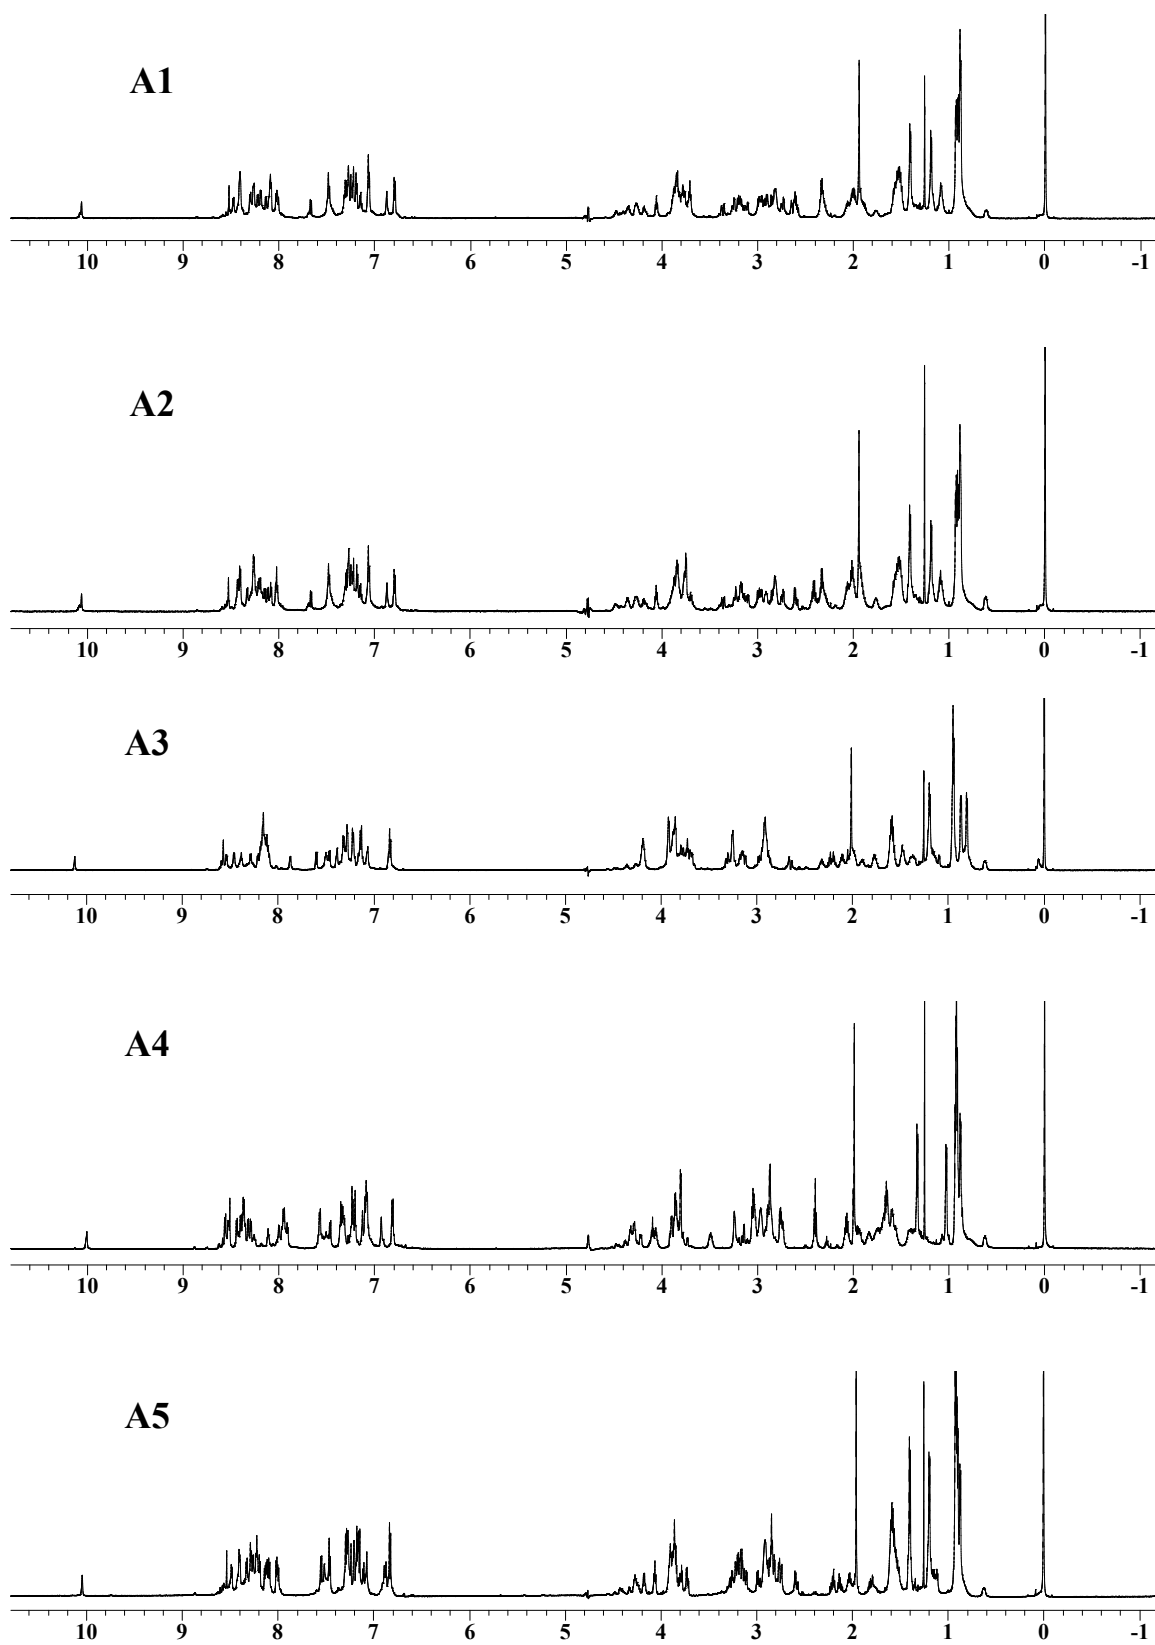

**Fig. S2:** <sup>1</sup>H-NMR spectra of peptide variants recorded in 90% H<sub>2</sub>O/10% D<sub>2</sub>O at 298 K on a 700 MHz spectrometer.

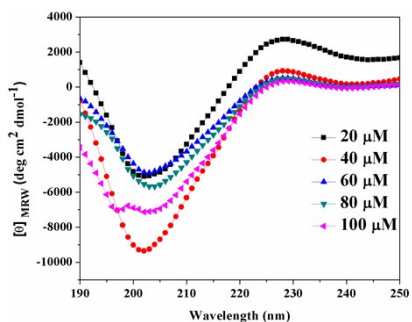

A1

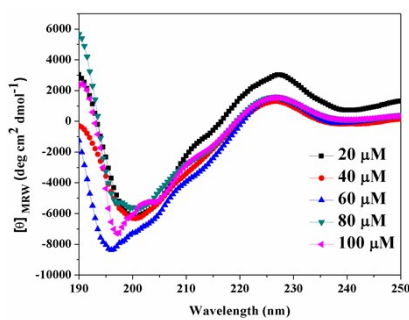

A2

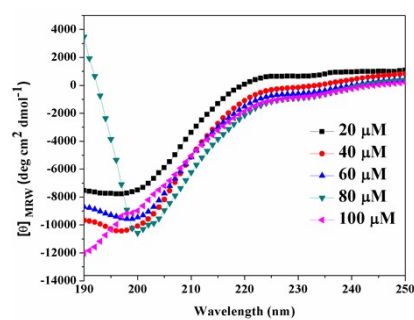

A3

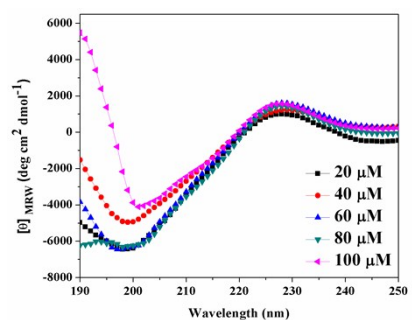

A4

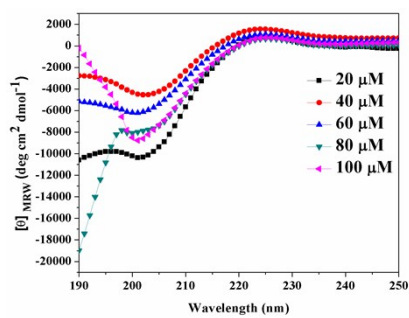

A5

**Fig. S3:** CD spectrum of peptide variants in water at 298 K in 20–100  $\mu\text{M}$  concentration range. Y-axis represents the mean residue molar ellipticity and X-axis represents wavelength in nm.

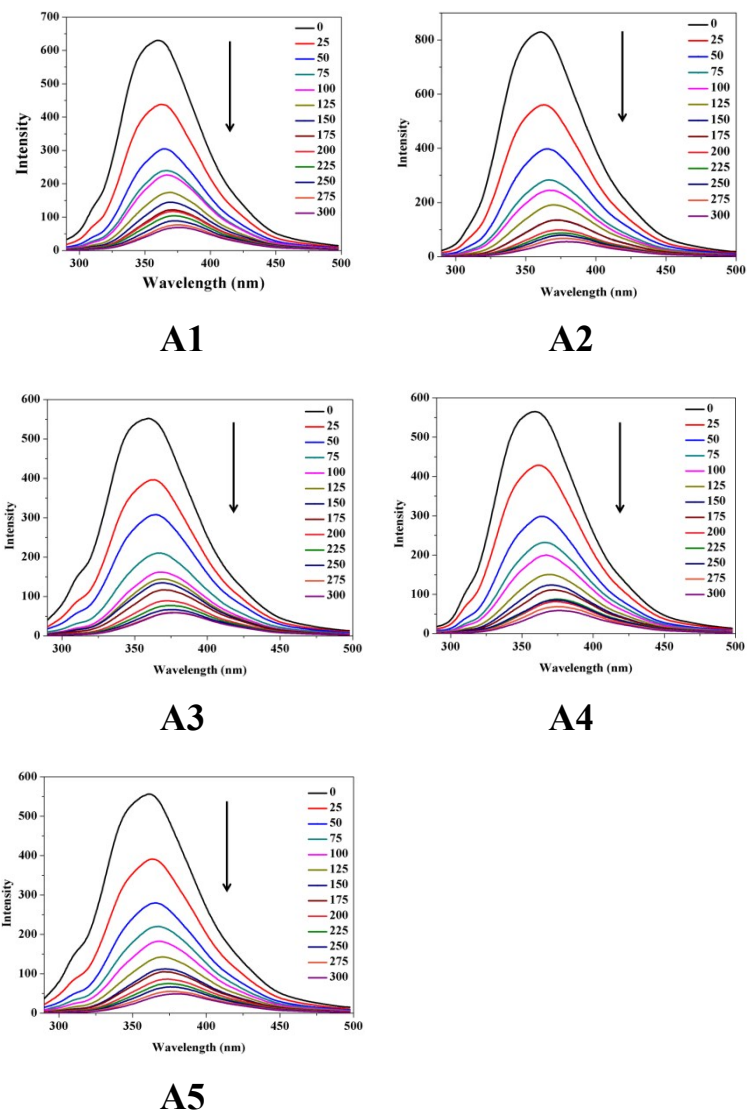

**Fig. S4:** Quenching of tryptophan fluorescence of peptide variants (15  $\mu\text{M}$ ) in sodium phosphate buffer (pH 7.0, 20 mM) at 298 K on progressive titration with increasing pNPP concentration (0–300  $\mu\text{M}$ ).



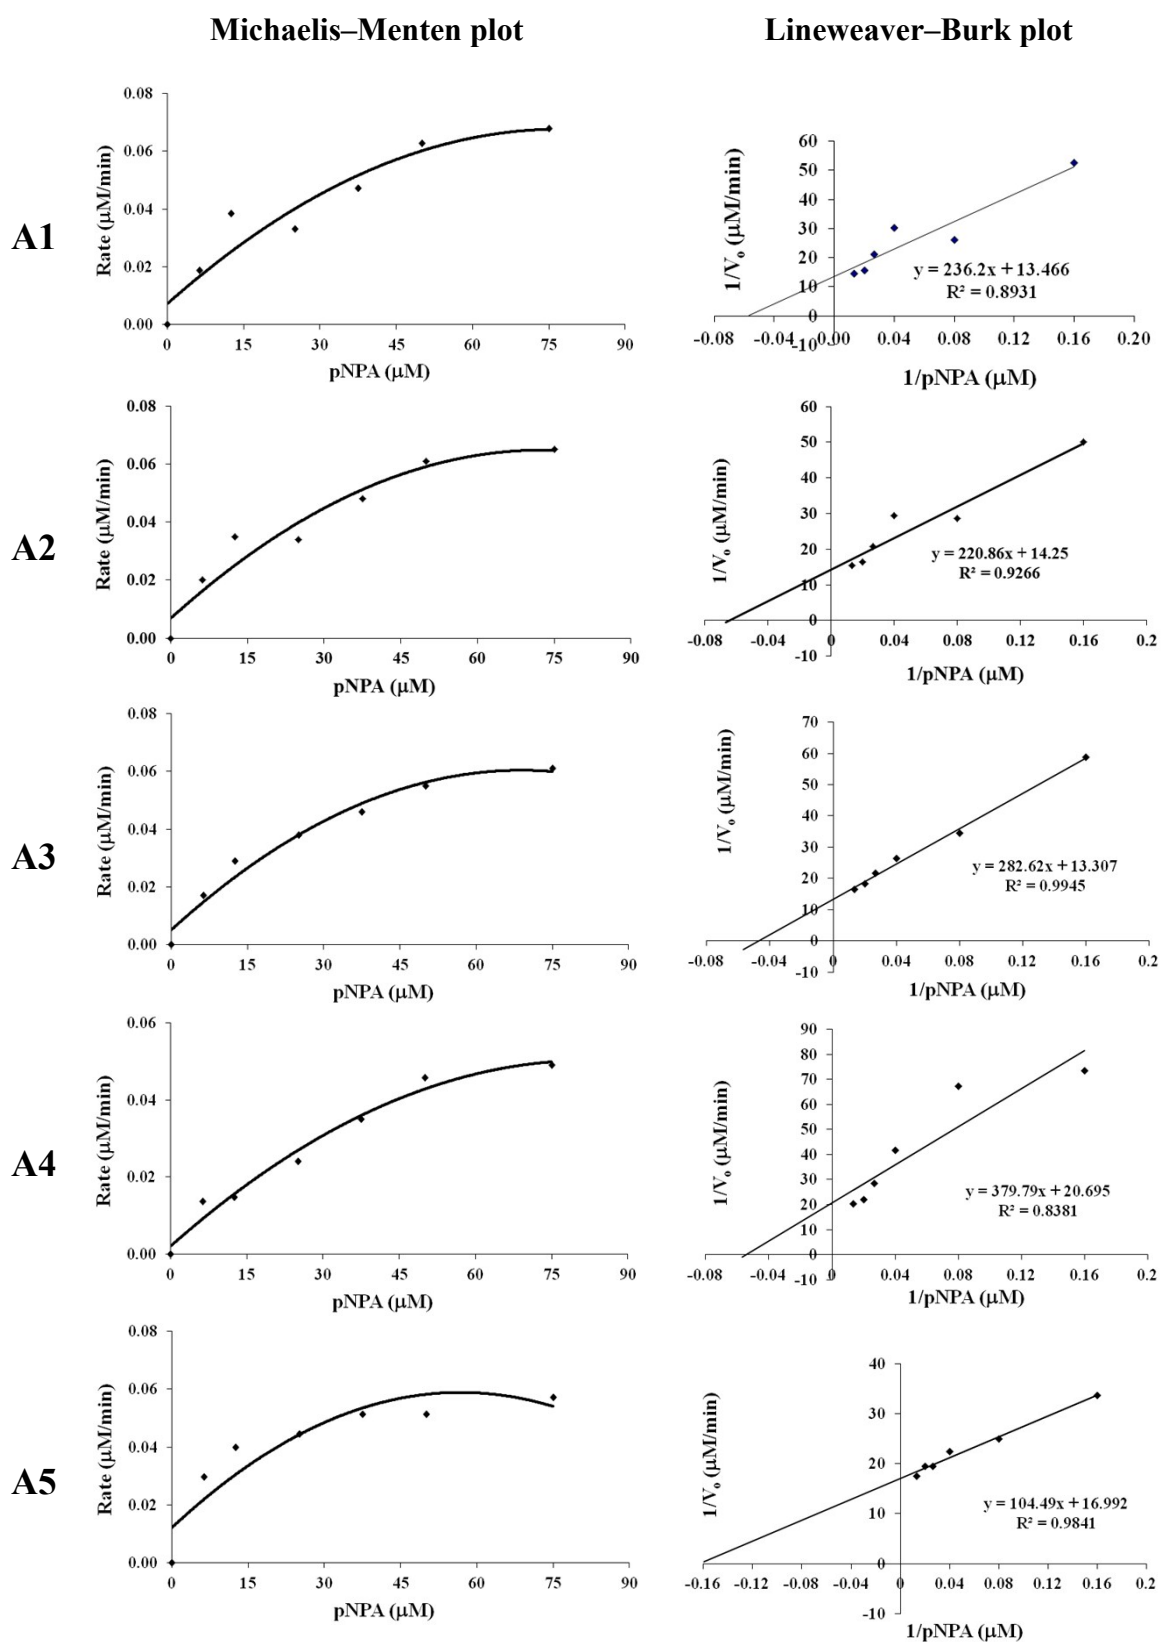

**Fig. S5:** UV monitored rate of hydrolysis of pNPA with peptide variants in sodium phosphate buffer (pH 7.0, 20 mM) at 298 K on progressive titration with increasing pNPA concentration (0–75  $\mu\text{M}$ ) in the form of Michaelis–Menten plot (**left panel**) and Lineweaver–Burk plot (**right panel**).
